# Supplementary material for: Temporal regulation of the Mediator complex during muscle proliferation, differentiation, regeneration, aging, and disease
Source: Front Cell Dev Biol. 2024 Apr 16;12:1331563. doi: 10.3389/fcell.2024.1331563 (PMC11058648; doi:10.3389/fcell.2024.1331563)
Supplement: Supplementary file 4 [file Table4.XLSX]

## Sheet: Sheet1
Supplementary Table S4.
RNA-seq raw values from 10- and 30-months-old mouse gastrocnemius muscle used to calculate z-scores for heatmap in Supplemental Figure 6A.
	Gas 10 month						Gas 30 month
Med15	11.41	10.51	11.23	13.71	11.28	10.86	12.08	14.56	11.09	12.27	14.6	13.3
Med16	26.98	24.28	23.13	28.3	26.3	25.29	29.48	24.15	28.47	28.02	27.42	29.83
Med23	6.4	5.38	5.46	7.35	6.62	6.81	4.85	6.68	5.17	6.77	7.42	5.88
Med24	36.04	33.19	33.93	39.41	35.76	41.11	38.74	37.34	42.02	37.3	40.94	38.5
Med25	64.99	62.65	69.83	62.71	58.04	59.09	53.06	58.12	61.67	57.52	68.92	73.79
Med1	14.07	12.69	12.78	17.11	15.33	15.34	14.94	15.89	13.97	16.55	16.97	13.83
Med4	18.76	19.33	21.5	20.95	20.26	19.46	21.06	21.55	19.81	22.63	21.89	21.32
Med7	14.13	13.08	13.78	12.65	11.96	14.05	14.83	16.11	12.78	14.91	13.18	13.65
Med9	18.99	19.48	19.88	18.85	19.11	24.08	18.78	19.1	21.77	19.58	18.97
Med10	11.17	14.85	14.33	12.9	10.93	12.91	14.07	12.71	13.24	11.36	13.38	14.05
Med19	8.53	7.09	8.52	7.24	9.44	7.67	9.38	9.77	11.09	10.1	9.22	9.64
Med21	42.6	43.84	41.53	34.53	40.14	39.52	39.07	41.12	35.63	34.09	41.77	35.55
Med26	4.36	3.66	3.59	4.53	4.34	3.81	4.74	6.08	4.37	6.14	5.3	5.85
Med31	7.15	6.67	7.22	8.51	6.29	7.61	8.11	7.91	5.97	6.5	6.45	6.4
Med6	17.61	14.99	14.06	16.62	13.59	15.34	17.65	19.02	14.64	11.71	14.28	14.03
Med8	45	41.14	44.57	44.99	42.16	47.24	40.75	46.77	43.42	38.99	42.52	42.84
Med11	5.98	8.5	7.24	7.69	6.75	7.21	5.74	6.6	5.67	8.19	4.62	6.29
Med14	19.87	17.25	19.63	22.32	22.57	22.5	23.21	20.6	19.04	21.37	17.52
Med17	7.51	6.92	7.48	10.97	8.29	9.92	9.34	9.55	8.08	8.82	9.84	9.64
Med18	1.1	1.21	0.69	2.3	1.17	1.66	1.01	2.31	1.46	1.49	1.69	1.71
Med20	10.19	10.58	10.45	11.05	9.41	10.06	11.28	9.87	9.43	11.21	9.9	9.06
Med22	17.25	17.89	15.31	16.83	15.89	18.03	15.14	13.98	14.95	18.51	15.42	16.27
Med27	14.68	16.33	14.05	16.64	15.54	15.62	19.72	22.35	16.42	19.11	16.1	14.58
Med28	40.51	47.93	46.43	43.24	41.38	43.19	41.88	45.32	40.07	39.13	43.22	46.41
Med29	22	23.92	20.41	21.8	22.83	20.79	23.58	23.53	19.44	21.89	20.84
Med30	17.67	18.36	18.07	13.03	16.89	19.66	12.84	15.68	12.92	12.49	18.52	14.93
CcnC	6.95	7.05	8.53	8.69	9.32	8.81	8.89	10.24	9.3	8.45	9.15	8.25
Cdk8	10.14	10.63	12.62	11.04	10.3	11.35	11.56	11.66	10.65	10.06	14.47	12.34
Med12	11.12	9.49	10.31	12.11	11.54	10.73	10.65	13.86	12.07	12.4	15.11	10.93
Med13	20.84	17.55	19.83	23.93	23.79	25.23	19.2	23.16	16.46	19.9	27.74	16.98
